# Supplementary material
Source: publisher figshare collection journal article supplement (https://springernature.figshare.com/ndownloader/files/18045926)
Supplement: Supplementary file [file 18045926]

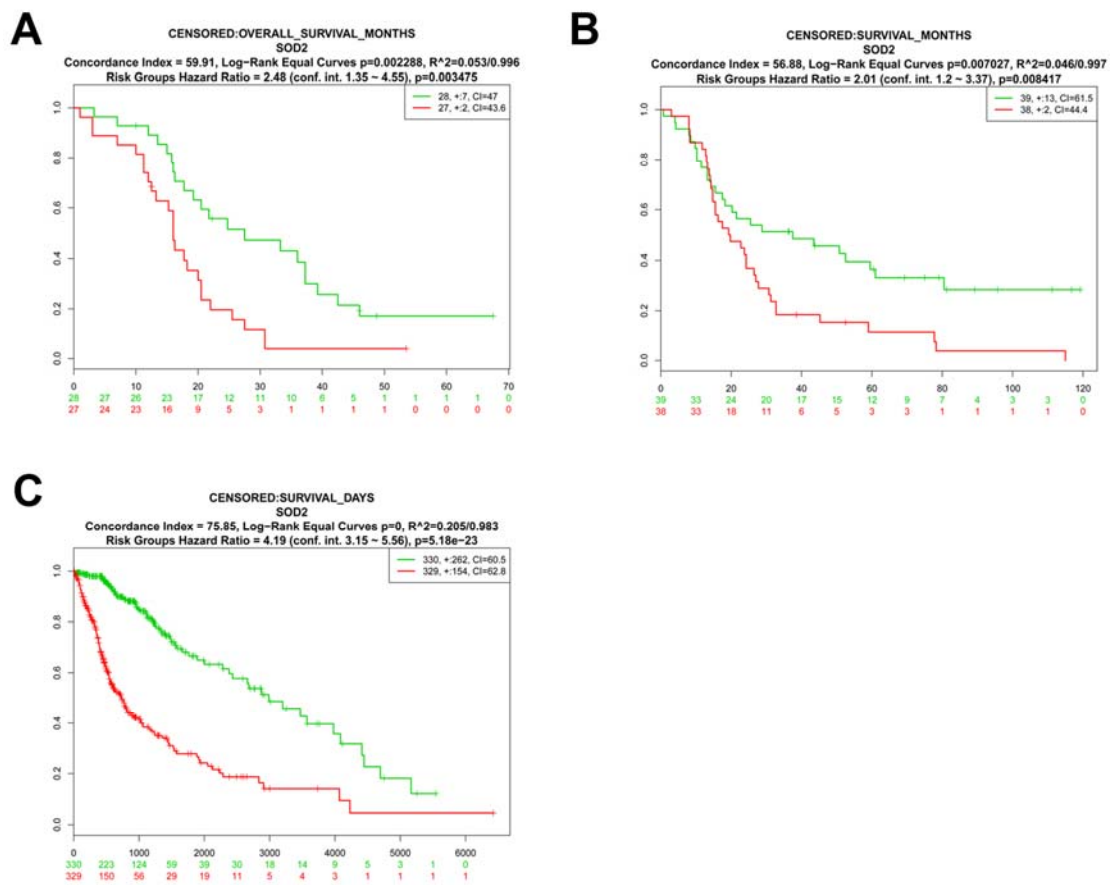

**Additional file 2: Figure S2.** Kaplan-Meier curves of an array database from SurvExpress (<http://bioinformatica.mty.itesm.mx:8080/Biomatec/SurvivaX.jsp>) [18]. The original data included samples of (A) GBM from Joo KM, et al., 2013 (<https://www.ncbi.nlm.nih.gov/geo/query/acc.cgi?acc=GSE42669>), (B) low-grade glioma and GBM from Phillips HS, et al., 2006 (<https://www.ncbi.nlm.nih.gov/geo/query/acc.cgi?acc=GSE4271>), and (C) low-grade glioma and GBM from TCGA. Each line refers to cases in which SOD2 gene expression was higher or lower than the median.
